# Supplementary material for: An integrative view of the regulatory and transcriptional landscapes in mouse hematopoiesis
Source: Genome Res. 2020 Mar;30(3):472–84. doi: 10.1101/gr.255760.119 (PMC7111515; doi:10.1101/gr.255760.119)
Supplement: Supplemental Material [file supp_gr.255760.119_Supplemental_Table_S1.xlsx]

## Sheet: Supplemental_Table_S1
Supplemental Table S1: RNA-seq datasets
Cell	Type	ID	Cell type	Tissue	Stage	External ID	Source	Reference	GEO	ENCODE	EBI	IDEAS 20.8	raw reads	mapped reads	filtered reads	%mapped	#exp genes TPM>=1	Spearman	MAD	Isolation/Sort markers	Comments
LSK	RNA	1007	Lin-, Sca1+, cKit+	bone marrow	adult		VISION	Heuston et al. 2018; PMID: 29807547	GSM2698610	ENCSR085AJX			73843836	55111695		0.746328	10902	0.939	0.537	CD4-, CD8-, IL7Ra-, CD11b-, Ly6g-, CD45R-, Ter119-, cKit+, Sca1+
LSK	RNA	1063	Lin-, Sca1+, cKit+	bone marrow	adult		VISION	Heuston et al. 2018; PMID: 29807547	GSM2698611	ENCSR085AJX			93842615	83452280		0.889279	10908			CD4-, CD8-, IL7Ra-, CD11b-, Ly6g-, CD45R-, Ter119-, cKit+, Sca1+
CMP	RNA	1009	common myeloid progenitor	bone marrow	adult		VISION	Heuston et al. 2018; PMID: 29807547	GSM2698635	ENCSR133SAI			76336823	53068430		0.695188	10385	0.958	0.408	CD4-, CD8-, IL7Ra-, CD11b-, Ly6g-, CD45R-, Ter119-, cKit+, Sca1-, CD34+, CD16/32-
CMP	RNA	1010	common myeloid progenitor	bone marrow	adult		VISION	Heuston et al. 2018; PMID: 29807547	GSM2698636	ENCSR133SAI			224960297	155342267		0.690532	10831			CD4-, CD8-, IL7Ra-, CD11b-, Ly6g-, CD45R-, Ter119-, cKit+, Sca1-, CD34+, CD16/32-
GMP	RNA	1017	granulocyte macrophage progenitor	bone marrow	adult		VISION	Heuston et al. 2018; PMID: 29807547	GSM2699700	ENCSR277DPB			115704916	75108202		0.649136	9885	0.965	0.392	CD4-, CD8-, IL7Ra-, CD11b-, Ly6g-, CD45R-, Ter119-, cKit+, Sca1-, CD34+, CD16/32+
GMP	RNA	1018	granulocyte macrophage progenitor	bone marrow	adult		VISION	Heuston et al. 2018; PMID: 29807547	GSM2699701	ENCSR277DPB			86717708	70399490		0.811824	10165			CD4-, CD8-, IL7Ra-, CD11b-, Ly6g-, CD45R-, Ter119-, cKit+, Sca1-, CD34+, CD16/32+
MEP	RNA	1019	megakaryocyte erythroid progenitor	bone marrow	adult		VISION	Heuston et al. 2018; PMID: 29807547	GSM2698615	ENCSR121HYR			129623204	68375149		0.527492	10152	0.934	0.569	CD4-, CD8-, IL7Ra-, CD11b-, Ly6g-, CD45R-, Ter119-, cKit+, Sca1-, CD34-, CD16/32-
MEP	RNA	1064	megakaryocyte erythroid progenitor	bone marrow	adult		VISION	Heuston et al. 2018; PMID: 29807547	GSM2698616	ENCSR121HYR			104418331	76484456		0.732481	9603			CD4-, CD8-, IL7Ra-, CD11b-, Ly6g-, CD45R-, Ter119-, cKit+, Sca1-, CD34-, CD16/32-
CFUE	RNA	1046	colony forming unit erythroblast	bone marrow	adult		VISION	Heuston et al. 2018; PMID: 29807547	GSM2701108	ENCSR847AMQ			141468597	123367182		0.872046	7062	0.888	0.642	CD4-, CD8-, IL7Ra-, CD11b-, Ly6g-, CD45R-, Ter119+, CD44+, FSCHigh
CFUE	RNA	1087	colony forming unit erythroblast	bone marrow	adult		VISION	Heuston et al. 2018; PMID: 29807547	GSM2701109	ENCSR847AMQ			133748192	92775316		0.693657	6097			CD4-, CD8-, IL7Ra-, CD11b-, Ly6g-, CD45R-, Ter119+, CD44+, FSCHigh
ERY	RNA	1047	erythroblast	bone marrow	adult		VISION	Heuston et al. 2018; PMID: 29807547	GSM2698707	ENCSR247IMK			99742922	86380451		0.866031	6739	0.89	0.671	CD4-, CD8-, IL7Ra-, CD11b-, Ly6g-, CD45R-, Ter119+, CD44+, FSCLow
ERY	RNA	1088	erythroblast	bone marrow	adult		VISION	Heuston et al. 2018; PMID: 29807547	GSM2698708	ENCSR247IMK			125833208	66207743		0.526155	5192			CD4-, CD8-, IL7Ra-, CD11b-, Ly6g-, CD45R-, Ter119+, CD44+, FSCLow
CFUMK	RNA	1049	colony forming unit megakaryocyte	bone marrow	adult		VISION	Heuston et al. 2018; PMID: 29807547	GSM2698411	ENCSR027FCH			72198257	64512086		0.893541	10722	0.97	0.37	CD4-, CD8-, IL7Ra-, CD11b-, Ly6g-, CD45R-, Ter119-, Sca1-, CD41+, CD61+, cKit+
CFUMK	RNA	1050	colony forming unit megakaryocyte	bone marrow	adult		VISION	Heuston et al. 2018; PMID: 29807547	GSM2698412	ENCSR027FCH			110159472	102000386		0.925934	10173			CD4-, CD8-, IL7Ra-, CD11b-, Ly6g-, CD45R-, Ter119-, Sca1-, CD41+, CD61+, cKit+
iMK	RNA	1051	megakaryocyte	bone marrow	adult		VISION	Heuston et al. 2018; PMID: 29807547	GSM2698409	ENCSR025JRA			73217334	68678478		0.938008	10299	0.97	0.327	CD4-, CD8-, IL7Ra-, CD11b-, Ly6g-, CD45R-, Ter119-, Sca1-, CD41+, CD61+, cKit-
iMK	RNA	1052	megakaryocyte	bone marrow	adult		VISION	Heuston et al. 2018; PMID: 29807547	GSM2698410	ENCSR025JRA			83842340	77331723		0.922347	10233			CD4-, CD8-, IL7Ra-, CD11b-, Ly6g-, CD45R-, Ter119-, Sca1-, CD41+, CD61+, cKit-
MON	RNA	1208	monocyte	peripheral blood	adult		VISION	Heuston et al. 2018; PMID: 29807547	GSM4255677	ENCSR069PIG			97043620	55299568		0.569842	8628	0.94	0.467	Ly6g-, CD11b+
MON	RNA	1233	monocyte	peripheral blood	adult		VISION	Heuston et al. 2018; PMID: 29807547	GSM4255678	ENCSR069PIG			101050094	51686866		0.511497	8373			Ly6g-, CD11b+
NEU	RNA	1156	neutrophil	peripheral blood	adult		VISION	Heuston et al. 2018; PMID: 29807547	GSM4255679	ENCSR074WOD			58587733	52820559		0.901563	8801	0.98	0.261	not sorted
NEU	RNA	1157	neutrophil	peripheral blood	adult		VISION	Heuston et al. 2018; PMID: 29807547	GSM4255680	ENCSR074WOD			54892509	48525120		0.884003	8599			not sorted
G1E	RNA	983	GATA1-deficient, erythroid-committed progenitor cell line	cell line	embryonic		VISION	Heuston et al. 2018; PMID: 29807547	GSM2700108	ENCSR475TDY			117598772	108482186		0.922477	9401	0.986	0.265	n/a
G1E	RNA	984	GATA1-deficient, erythroid-committed progenitor cell line	cell line	embryonic		VISION	Heuston et al. 2018; PMID: 29807547	GSM2700109	ENCSR475TDY			105224381	93223249		0.885947	9424			n/a
G1E-ER4+E2	RNA	985	G1E clone rescued by expression of an E2-dependent GATA1-ER hybrid protein	cell line	embryonic		VISION	Heuston et al. 2018; PMID: 29807547	GSM2700248	ENCSR538CVD			108991309	100129522		0.918693	8722	0.983	0.267	n/a
G1E-ER4+E2	RNA	986	G1E clone rescued by expression of an E2-dependent GATA1-ER hybrid protein	cell line	embryonic		VISION	Heuston et al. 2018; PMID: 29807547	GSM2700249	ENCSR538CVD			75058724	68350644		0.910629	8752			n/a
CLP	RNA	100237	common lymphoid progenitor	bone marrow	adult		Amit	Lara-Astiaso et al. 2014; PMID: 25103404	GSM1464971				16220687	14916614		0.919604	13930			Lin-, Flk2+, Il7R+
B cells	RNA	100238	B cell	spleen	adult		Amit	Lara-Astiaso et al. 2014; PMID: 25103404	GSM1464977				4033055	3652097		0.905541	12996			Cd3-, B220, CD19+
T_CD4	RNA	100241	T cell CD4+	spleen	adult		Amit	Lara-Astiaso et al., 2014	GSM1464978				2092452	1866192		0.891868	13154			CD3+, B220-, CD4+, CD8-
T_CD8	RNA	100239	T cell CD8+	spleen	adult		Amit	Lara-Astiaso et al., 2014	GSM1464979				5306043	4715136		0.888635	13446			CD3+, B220-, CD4-, CD8+
NK	RNA	100240	natural killer cell	spleen	adult		Amit	Lara-Astiaso et al. 2014; PMID: 25103404	GSM1464980				7163803	6495019		0.906644	13394			CD4-, CD8-, B220-, I-Ab-, Ter119-, TCR-B-, NK1.1+
