# Supplementary material for: An integrative view of the regulatory and transcriptional landscapes in mouse hematopoiesis
Source: Genome Res. 2020 Mar;30(3):472–84. doi: 10.1101/gr.255760.119 (PMC7111515; doi:10.1101/gr.255760.119)
Supplement: Supplemental Material [file supp_gr.255760.119_Supplemental_Table_S2.xlsx]

## Sheet: Supplemental_Table_S2
Supplemental Table S2: ATAC-seq datasets
Cell name	Type	ID	Cell type	Tissue	Stage	External ID	Source	Reference	GEO	ENCODE	EBI	IDEAS 20.8	raw reads	mapped reads	filtered reads	% mapped	dup rate	FRiP	Spearman	Isolation/Sort markers	Comments
LSK	ATAC	987	Lin-, Sca1+, cKit+	bone marrow	adult		VISION	Heuston et al. 2018; PMID: 29807547	GSM4255742	ENCSR366VBB		yes	103568189	93688315	62709949	0.904605	78	0.269	0.66	CD4-, CD8-, IL7Ra-, CD11b-, Ly6g-, CD45R-, Ter119-, cKit+, Sca1+
LSK	ATAC	1196	Lin-, Sca1+, cKit+	bone marrow	adult		VISION	Heuston et al. 2018; PMID: 29807547	GSM4255743	ENCSR366VBB		yes	83762030	69316727	62391674	0.827544	49	0.29		CD4-, CD8-, IL7Ra-, CD11b-, Ly6g-, CD45R-, Ter119-, cKit+, Sca1+
CMP	ATAC	842	common myeloid progenitor	bone marrow	adult		VISION	Heuston et al. 2018; PMID: 29807547	GSM4255744	ENCSR914PYX		yes	143055480	127132490	93259164	0.888694	89	0.501	0.92	CD4-, CD8-, IL7Ra-, CD11b-, Ly6g-, CD45R-, Ter119-, cKit+, Sca1-, CD34+, CD16/32-
CMP	ATAC	850	common myeloid progenitor	bone marrow	adult		VISION	Heuston et al. 2018; PMID: 29807547	GSM4255745	ENCSR914PYX		yes	69525982	62612877	43959839	0.900568	90	0.627		CD4-, CD8-, IL7Ra-, CD11b-, Ly6g-, CD45R-, Ter119-, cKit+, Sca1-, CD34+, CD16/32-
GMP	ATAC	843	granulocyte macrophage progenitor	bone marrow	adult		VISION	Heuston et al. 2018; PMID: 29807547	GSM4255746	ENCSR257PGU		yes	163819763	151800177	109391011	0.926629	93	0.678	0.95	CD4-, CD8-, IL7Ra-, CD11b-, Ly6g-, CD45R-, Ter119-, cKit+, Sca1-, CD34+, CD16/32+
GMP	ATAC	851	granulocyte macrophage progenitor	bone marrow	adult		VISION	Heuston et al. 2018; PMID: 29807547	GSM4255747	ENCSR257PGU		yes	122103958	110000095	85901782	0.900872	90	0.56		CD4-, CD8-, IL7Ra-, CD11b-, Ly6g-, CD45R-, Ter119-, cKit+, Sca1-, CD34+, CD16/32+
MEP	ATAC	844	megakaryocyte erythroid progenitor	bone marrow	adult		VISION	Heuston et al. 2018; PMID: 29807547	GSM4255748	ENCSR064IHX		yes	126328237	111974492	94544001	0.886377	89	0.454	0.90	CD4-, CD8-, IL7Ra-, CD11b-, Ly6g-, CD45R-, Ter119-, cKit+, Sca1-, CD34-, CD16/32-
MEP	ATAC	852	megakaryocyte erythroid progenitor	bone marrow	adult		VISION	Heuston et al. 2018; PMID: 29807547	GSM4255749	ENCSR064IHX		yes	106955112	96197750	68757154	0.899422	76	0.54		CD4-, CD8-, IL7Ra-, CD11b-, Ly6g-, CD45R-, Ter119-, cKit+, Sca1-, CD34-, CD16/32-
CFUE	ATAC	845	colony forming unit erythroblast	bone marrow	adult		VISION	Heuston et al. 2018; PMID: 29807547	GSM4255750	ENCSR136XSY		yes	132260182	102010632	88651192	0.771288	87	0.522	0.72	CD4-, CD8-, IL7Ra-, CD11b-, Ly6g-, CD45R-, Ter119+, CD44+, FSCHigh
CFUE	ATAC	853	colony forming unit erythroblast	bone marrow	adult		VISION	Heuston et al. 2018; PMID: 29807547	GSM4255751	ENCSR136XSY		yes	101157244	85759211	75303787	0.847781	84	0.469		CD4-, CD8-, IL7Ra-, CD11b-, Ly6g-, CD45R-, Ter119+, CD44+, FSCHigh
ERY	ATAC	854	erythroblast	bone marrow	adult		VISION	Heuston et al. 2018; PMID: 29807547	GSM4255752	ENCSR793RAV		yes	110193410	97084037	86019796	0.881033	81	0.519		CD4-, CD8-, IL7Ra-, CD11b-, Ly6g-, CD45R-, Ter119+, CD44+, FSCLow
ERY	ATAC	846	erythroblast	bone marrow	adult		VISION	Heuston et al. 2018; PMID: 29807547	GSM4255753	ENCSR793RAV		yes	95579091	84288864	75634519	0.881876	79	0.522	0.83	CD4-, CD8-, IL7Ra-, CD11b-, Ly6g-, CD45R-, Ter119+, CD44+, FSCLow
CFUMK	ATAC	847	colony forming unit megakaryocyte	bone marrow	adult		VISION	Heuston et al. 2018; PMID: 29807547	GSM4255754	ENCSR229QKB		yes	145531078	101653124	69891983	0.698498	71	0.556	0.96	CD4-, CD8-, IL7Ra-, CD11b-, Ly6g-, CD45R-, Ter119-, Sca1-, CD41+, CD61+, cKit+
CFUMK	ATAC	855	colony forming unit megakaryocyte	bone marrow	adult		VISION	Heuston et al. 2018; PMID: 29807547	GSM4255755	ENCSR229QKB		yes	112167627	77628110	53028887	0.692072	69	0.698		CD4-, CD8-, IL7Ra-, CD11b-, Ly6g-, CD45R-, Ter119-, Sca1-, CD41+, CD61+, cKit+
iMK	ATAC	848	megakaryocyte	bone marrow	adult		VISION	Heuston et al. 2018; PMID: 29807547	GSM4255756	ENCSR498DQA		yes	103996654	94149662	79078098	0.905314	81	0.59	0.92	CD4-, CD8-, IL7Ra-, CD11b-, Ly6g-, CD45R-, Ter119-, Sca1-, CD41+, CD61+, cKit-
iMK	ATAC	856	megakaryocyte	bone marrow	adult		VISION	Heuston et al. 2018; PMID: 29807547	GSM4255757	ENCSR498DQA		yes	139764600	127168256	100388719	0.909875	86	0.545		CD4-, CD8-, IL7Ra-, CD11b-, Ly6g-, CD45R-, Ter119-, Sca1-, CD41+, CD61+, cKit-
MON	ATAC	1197	monocyte	peripheral blood	adult		VISION	Heuston et al. 2018; PMID: 29807547	GSM4255758	ENCSR862JVD		yes	76843836	64814862	63697081	0.84	73	0.4	0.59	Ly6g-, CD11b+
MON	ATAC	1198	monocyte	peripheral blood	adult		VISION	Heuston et al. 2018; PMID: 29807547	GSM4255759	ENCSR862JVD		yes	86729271	72867399	71356628	0.84	64	0.36		Ly6g-, CD11b+
NEU	ATAC	1199	neutrophil	peripheral blood	adult		VISION	Heuston et al. 2018; PMID: 29807547	GSM4255760	ENCSR351YUI		yes	85262113	74133309	63412993	0.86	63	0.35	0.81	not sorted
NEU	ATAC	1200	neutrophil	peripheral blood	adult		VISION	Heuston et al. 2018; PMID: 29807547	GSM4255761	ENCSR351YUI		yes	78519573	67462424	59440642	0.85	84	0.54		not sorted
G1E	ATAC	870	GATA1-deficient, erythroid-committed progenitor cell line	cell line	embryo		VISION	Heuston et al. 2018; PMID: 29807547	GSM4255762	ENCSR280ZDP		yes	61288454	47752633	24442443	0.779146	78	0.653	0.84	n/a
G1E	ATAC	871	GATA1-deficient, erythroid-committed progenitor cell line	cell line	embryo		VISION	Heuston et al. 2018; PMID: 29807547	GSM4255763	ENCSR280ZDP		yes	74703907	55607960	25486910	0.744378	74	0.727		n/a
G1E-ER4+E2	ATAC	872	G1E clone rescued by expression of an E2-dependent GATA1-ER hybrid protein	cell line	embryo		VISION	Heuston et al. 2018; PMID: 29807547	GSM4255764	ENCSR428BSK		yes	70023492	56972956	29530404	0.813626	81	0.66	0.87	n/a
G1E-ER4+E2	ATAC	873	G1E clone rescued by expression of an E2-dependent GATA1-ER hybrid protein	cell line	embryo		VISION	Heuston et al. 2018; PMID: 29807547	GSM4255765	ENCSR428BSK		yes	67446917	54766258	29212522	0.811991	81	0.659		n/a
B	ATAC	100072	B cell	spleen	adult		Amit	Lara-Astiaso et al. 2014; PMID: 25103404	GSM1463172			yes	46146500	41989217	34626606	0.909911		0.702		Cd3-, B220, CD19+
GMP	ATAC	100073	granulocyte macrophage progenitor	bone marrow	adult		Amit	Lara-Astiaso et al. 2014; PMID: 25103404	GSM1463173				51853130	45635860		0.880098		0.685		Lin-, c-Kit+, Sca-1+, FcgRII high, CD34+
MON	ATAC	100074	monocyte	bone marrow	adult		Amit	Lara-Astiaso et al. 2014; PMID: 25103404	GSM1463174				23664665	12945960		0.547059		0.39		CD3-, B220-, NK1.1-, F4/80-, CD115+, Low SSC
T_CD4	ATAC	100075	T cell CD4+	spleen	adult		Amit	Lara-Astiaso et al. 2014; PMID: 25103404	GSM1463175			yes	30397752	22024166	22024166	0.724533		0.863		CD3+, B220-, CD4+, CD8-
NEU	ATAC	100076	granulocyte	bone marrow	adult		Amit	Lara-Astiaso et al. 2014; PMID: 25103404	GSM1463176				48247107	31023095		0.643004		0.133		CD3- B220-, NK1.1-, CD11b+, Grl+, High SSC
NK	ATAC	100077	natural killer cell	spleen	adult		Amit	Lara-Astiaso et al. 2014; PMID: 25103404	GSM1463177			yes	36870255	33987697	33987697	0.921819		0.786		CD4-, CD8-, B220-, I-Ab-, Ter119-, TCR-B-, NK1.1+
T_CD8	ATAC	100078	T cell CD8+	spleen	adult		Amit	Lara-Astiaso et al. 2014; PMID: 25103404	GSM1463178			yes	25777793	23054125	19447601	0.894341		0.85		CD3+, B220-, CD4-, CD8+
LSK	ATAC	100079	Lin-, c-Kit+, Sca-1+	bone marrow	adult		Amit	Lara-Astiaso et al. 2014; PMID: 25103404	GSM1463179				49716538	45891111		0.923055		0.747		Lin-, c-Kit+, Sca-1+
CMP	ATAC	100080	common myeloid progenitor	bone marrow	adult		Amit	Lara-Astiaso et al. 2014; PMID: 25103404	GSM1463180				49803961	43376080		0.870936		0.692		Lin-, c-Kit+, Sca-1-, FcgRII low, CD34+
MEP	ATAC	100081	megakaryocyte erythroid progenitor	bone marrow	adult		Amit	Lara-Astiaso et al. 2014; PMID: 25103404	GSM1463181				50318238	43915346		0.872752		0.405		Lin-, c-Kit+, Sca-1-, FcgRII high, CD34+
