# Supplementary material for: An integrative view of the regulatory and transcriptional landscapes in mouse hematopoiesis
Source: Genome Res. 2020 Mar;30(3):472–84. doi: 10.1101/gr.255760.119 (PMC7111515; doi:10.1101/gr.255760.119)
Supplement: Supplemental Material [file supp_gr.255760.119_Supplemental_Table_S3.xlsx]

## Sheet: Supplemental_Table_S3
Supplemental Table S3: DNase-seq datasets
Cell	Type	Library ID	Cell type	Tissue	Stage	External ID	Source	Reference	GEO	ENCODE	EBI	IDEAS 20.8	raw reads	mapped reads	filtered reads	%mapped	FRiP	Input ID	Isolation/Sort markers	Comments
HPC7	DNase	100130	multilineage myeloid progenitor cell line	cell line	embryonic		Gottgens	Wilson et al., 2016; PMID: 26809507			ERR1088374	yes	25020527	16848292		0.673379	0.211
HPC7	DNase	100131	multilineage myeloid progenitor cell line	cell line	embryonic		Gottgens	Wilson et al., 2016; PMID: 26809507			ERR1088375	yes	137538049	89139970		0.648111	0.263
ERY_fl	DNase	100137	erythroblast	fetal liver	fetal		BenderStam	Yue et al., 2014; PMID: 25409824		ENCSR000CMR		yes	62679645	38184521		0.609201	0.335		From ENCODE metadata on ENCSR000CMR: "male embryo (14.5 days) c-Kit-negative CD71-positive TER-119-positive erythroid progenitor cells primary cell"
