# Supplementary material for: An integrative view of the regulatory and transcriptional landscapes in mouse hematopoiesis
Source: Genome Res. 2020 Mar;30(3):472–84. doi: 10.1101/gr.255760.119 (PMC7111515; doi:10.1101/gr.255760.119)
Supplement: Supplemental Material [file supp_gr.255760.119_Supplemental_Table_S4.xlsx]

## Sheet: Supplemental_Table_S4
Supplemental Table S4: ChIP-seq datasets
Cell	Type	Library ID	Cell type	Tissue	Stage	External ID	Source	Reference	GEO	ENCODE	EBI	IDEAS 20.8	raw reads	mapped reads	filtered reads	%mapped	FRiP	Input ID	Isolation/Sort markers	Comments
LSK	CTCF	1295	Lin-, Sca1+, cKit+	bone marrow	adult		VISION		GSM4255729			yes	82541801	79058840		0.957804	0.038	1296	CD4-, CD8-, IL7Ra-, CD11b-, Ly6g-, CD45R-, Ter119-, cKit+, Sca1+
G1E	CTCF	26	GATA1-deficient, erythroid-committed progenitor cell line	cell line	embryonic		VISION	Wu et al. 2014; PMID: 25319994	GSM923570	ENCSR000DIS		yes	14992093	14350284		0.95719	0.06	18	n/a
G1E	CTCF	75	GATA1-deficient, erythroid-committed progenitor cell line	cell line	embryonic		VISION	Wu et al. 2014; PMID: 25319994	GSM923570	ENCSR000DIS		yes	30354272	28953929		0.953867	0.03	18	n/a
G1E-ER4+E2	CTCF	25	G1E clone rescued by expression of an E2-dependent GATA1-ER hybrid protein	cell line	embryonic		VISION	Wu et al. 2014; PMID: 25319994	GSM923571	ENCSR000DIR		yes	14336356	13957215		0.973554	0.13	2	n/a
G1E-ER4+E2	CTCF	76	G1E clone rescued by expression of an E2-dependent GATA1-ER hybrid protein	cell line	embryonic		VISION	Wu et al. 2014; PMID: 25319994	GSM923571	ENCSR000DIR		yes	13857723	12949147		0.934435	0.18	2	n/a
CH12	CTCF	35	B cell lymphoma	cell line	adult		VISION	Yue et al., 2014; PMID: 25409824	GSM923568	ENCSR000DIU		yes	14758965	14404662		0.975994	0.07	36	n/a
CH12	CTCF	47	B cell lymphoma	cell line	adult		VISION	Yue et al., 2014; PMID: 25409824	GSM923568	ENCSR000DIU		yes	24993861	24294384		0.972014	0.05	36	n/a
G1E	H3K4me1	21	GATA1-deficient, erythroid-committed progenitor cell line	cell line	embryonic		VISION	Wu et al. 2014; PMID: 25319994	GSM946535	ENCSR000DJB		yes	34088173	33079509		0.97041	0.553	18	n/a
G1E	H3K4me1	87	GATA1-deficient, erythroid-committed progenitor cell line	cell line	embryonic		VISION	Wu et al. 2014; PMID: 25319994	GSM946535	ENCSR000DJB		yes	49615724	46661563		0.940459	0.284	138	n/a
G1E-ER4+E2	H3K4me1	12	G1E clone rescued by expression of an E2-dependent GATA1-ER hybrid protein	cell line	embryonic		VISION	Dogan et al. 2015; PMID: 25984238	GSM946534	ENCSR000DIY		yes	24839073	24117452		0.970948	0.457	2	n/a
G1E-ER4+E2	H3K4me1	99	G1E clone rescued by expression of an E2-dependent GATA1-ER hybrid protein	cell line	embryonic		VISION	Dogan et al. 2015; PMID: 25984238	GSM946534	ENCSR000DIY		yes	11447979	10996428		0.960556	0.746	137	n/a
ERY_fl	H3K4me1	95	erythroblast	fetal liver	fetal		VISION	Wu et al. 2014; PMID: 25319994	GSM946536	ENCSR000DHK		yes	90552604	84702369		0.935394	0.371	56	ter119+
ERY_fl	H3K4me1	116	erythroblast	fetal liver	fetal		VISION	Wu et al. 2014; PMID: 25319994	GSM946536	ENCSR000DHK		yes	106280129	99747216		0.938531	0.449	150	ter119+
MK_fl	H3K4me1	96	megakaryocyte	fetal liver	fetal		VISION	Wu et al. 2014; PMID: 25319994	GSM946525	ENCSR000DHR		yes	82417509	77849183		0.944571	0.595	48	CD41+
MK_fl	H3K4me1	115	megakaryocyte	fetal liver	fetal		VISION	Wu et al. 2014; PMID: 25319994	GSM946525	ENCSR000DHR		yes	124430081	110376921		0.88706	0.463	140	CD41+
G1E	H3K4me3	22	GATA1-deficient, erythroid-committed progenitor cell line	cell line	embryonic		VISION	Wu et al. 2014; PMID: 25319994	GSM946533	ENCSR000DIX		yes	35334197	33768080		0.955677	0.775	18	n/a
G1E	H3K4me3	97	GATA1-deficient, erythroid-committed progenitor cell line	cell line	embryonic		VISION	Wu et al. 2014; PMID: 25319994	GSM946533	ENCSR000DIX		yes	95699196	81701222		0.853729	0.197	138	n/a
G1E-ER4+E2	H3K4me3	13	G1E clone rescued by expression of an E2-dependent GATA1-ER hybrid protein	cell line	embryonic		VISION	Wu et al. 2014; PMID: 25319994	GSM946519	ENCSR000DIW		yes	11447979	10996428		0.960556	0.746	2	n/a
G1E-ER4+E2	H3K4me3	98	G1E clone rescued by expression of an E2-dependent GATA1-ER hybrid protein	cell line	embryonic		VISION	Wu et al. 2014; PMID: 25319994	GSM946519	ENCSR000DIW		yes	103282886	87528400		0.847463	0.166	137	n/a
ERY_fl	H3K4me3	120	erythroblast	fetal liver	fetal		VISION	Wu et al. 2014; PMID: 25319994	GSM946524	ENCSR000DHG		yes	110225144	100426586		0.911104	0.721	56	ter119+
ERY_fl	H3K4me3	131	erythroblast	fetal liver	fetal		VISION	Wu et al. 2014; PMID: 25319994	GSM946524	ENCSR000DHG		yes	94197342	88532544		0.939862	0.66	150	ter119+
MK_fl	H3K4me3	118	megakaryocyte	fetal liver	fetal		VISION	Wu et al. 2014; PMID: 25319994	GSM946527	ENCSR000DHT		yes	132751479	111029370		0.83637	0.452	48	CD41+
MK_fl	H3K4me3	119	megakaryocyte	fetal liver	fetal		VISION	Wu et al. 2014; PMID: 25319994	GSM946527	ENCSR000DHT		yes	104594020	97158902		0.928915	0.77	140	CD41+
G1E	H3K27ac	534	GATA1-deficient, erythroid-committed progenitor cell line	cell line	embryonic		VISION	Dogan et al. 2015; PMID: 25984238	GSM1502751			yes	24040148	23243781		0.966873	0.57	18, 138	n/a
G1E	H3K27ac	535	GATA1-deficient, erythroid-committed progenitor cell line	cell line	embryonic		VISION	Dogan et al. 2015; PMID: 25984238	GSM1502752			yes	30711432	29691714		0.966797	0.655	18, 138	n/a
G1E-ER4+E2	H3K27ac	538	G1E clone rescued by expression of an E2-dependent GATA1-ER hybrid protein	cell line	embryonic		VISION	Dogan et al. 2015; PMID: 25984238	GSM1502753			yes	45479736	43920417		0.965714	0.408	2, 137	n/a
G1E-ER4+E2	H3K27ac	539	G1E clone rescued by expression of an E2-dependent GATA1-ER hybrid protein	cell line	embryonic		VISION	Dogan et al. 2015; PMID: 25984238	GSM1502754			yes	40216174	38787438		0.964474	0.499	2, 137	n/a
G1E	H3K36me3	127	GATA1-deficient, erythroid-committed progenitor cell line	cell line	embryonic		VISION	Wu et al. 2014; PMID: 25319994	GSM946533	ENCSR000DHV		yes	86998117	82807607		0.951832	0.81	138	n/a
G1E	H3K36me3	108	GATA1-deficient, erythroid-committed progenitor cell line	cell line	embryonic		VISION	Wu et al. 2014; PMID: 25319994	GSM946533	ENCSR000DHV		yes	116403361	110577326		0.94995	0.77	138	n/a
G1E-ER4+E2	H3K36me3	135	G1E clone rescued by expression of an E2-dependent GATA1-ER hybrid protein	cell line	embryonic		VISION	Wu et al. 2014; PMID: 25319994	GSM946529	ENCSR000DHS		yes	100910289	95202307		0.943435	0.67	137	n/a
G1E-ER4+E2	H3K36me3	109	G1E clone rescued by expression of an E2-dependent GATA1-ER hybrid protein	cell line	embryonic		VISION	Wu et al. 2014; PMID: 25319994	GSM946529	ENCSR000DHS		yes	95902219	91636313		0.955518	0.8	137	n/a
CH12	H3K36me3	126	B cell lymphoma	cell line	adult		VISION	Yue et al., 2014; PMID: 25409824	GSM946530	ENCSR000DHW		yes	102361466	95148887		0.929538	0.55	141	n/a
CH12	H3K36me3	157	B cell lymphoma	cell line	adult		VISION	Yue et al., 2014; PMID: 25409824	GSM946530	ENCSR000DHW		yes	105063934	103073154		0.981052	0.73	141	n/a
ERY_fl	H3K36me3	124	erythroblast	fetal liver	fetal		VISION	Wu et al. 2014; PMID: 25319994	GSM946543	ENCSR000DHL		yes	91149357	85401226		0.936937	0.66	56	ter119+
ERY_fl	H3K36me3	133	erythroblast	fetal liver	fetal		VISION	Wu et al. 2014; PMID: 25319994	GSM946543	ENCSR000DHL		yes	103228393	99046864		0.959492	0.69	150	ter119+
MK_fl	H3K36me3	123	megakaryocyte	fetal liver	fetal		VISION	Wu et al. 2014; PMID: 25319994	GSM946540	ENCSR000DHI		yes	100318158	95062719		0.947612	0.67	48	CD41+
MK_fl	H3K36me3	145	megakaryocyte	fetal liver	fetal		VISION	Wu et al. 2014; PMID: 25319994	GSM946540	ENCSR000DHI		yes	91662936	88551888		0.96606	0.55	48	CD41+
G1E	H3K27me3	15	GATA1-deficient, erythroid-committed progenitor cell line	cell line	embryonic		VISION	Wu et al. 2014; PMID: 25319994	GSM946531	ENCSR000DHX		yes	22324068	19468627		0.872091	0.38	18	n/a
G1E	H3K27me3	24	GATA1-deficient, erythroid-committed progenitor cell line	cell line	embryonic		VISION	Wu et al. 2014; PMID: 25319994	GSM946531	ENCSR000DHX		yes	16593566	16274093		0.980747	0.39	138	n/a
G1E-ER4+E2	H3K27me3	11	G1E clone rescued by expression of an E2-dependent GATA1-ER hybrid protein	cell line	embryonic		VISION	Wu et al. 2014; PMID: 25319994	GSM946537	ENCSR000DIZ		yes	21981688	20069866		0.913027	0.375	2	n/a
G1E-ER4+E2	H3K27me3	113	G1E clone rescued by expression of an E2-dependent GATA1-ER hybrid protein	cell line	embryonic		VISION	Wu et al. 2014; PMID: 25319994	GSM946537	ENCSR000DIZ		yes	115996679	108214236		0.932908	0.45	137	n/a
CH12	H3K27me3	102	B cell lymphoma	cell line	adult		VISION	Yue et al., 2014; PMID: 25409824	GSM946532	ENCSR000DHY		yes	112512924	87979583		0.781951	0.1	36	n/a
CH12	H3K27me3	103	B cell lymphoma	cell line	adult		VISION	Yue et al., 2014; PMID: 25409824	GSM946532	ENCSR000DHY		yes	101329324	97449865		0.961714	0.45	141	n/a
ERY_fl	H3K27me3	112	erythroblast	fetal liver	fetal		VISION	Pimkin_etal_2012	GSM946547	ENCSR000DHP		yes	111315529	98806441		0.887625	0.3	56	ter119+
ERY_fl	H3K27me3	132	erythroblast	fetal liver	fetal		VISION	Pimkin_etal_2012	GSM946547	ENCSR000DHP		yes	93524367	85996327		0.919507	0.32	150	ter119+
MK_fl	H3K27me3	111	megakaryocyte	fetal liver	fetal		VISION	Pimkin_etal_2012	GSM946523	ENCSR000DHF		yes	106935223	97948477		0.915961	0.32	48	CD41+
MK_fl	H3K27me3	130	megakaryocyte	fetal liver	fetal		VISION	Pimkin_etal_2012	GSM946523	ENCSR000DHF		yes	92144930	87498286		0.949572	0.51	140	CD41+
G1E	H3K9me3	88	GATA1-deficient, erythroid-committed progenitor cell line	cell line	embryonic		VISION	Wu et al. 2014; PMID: 25319994	GSM946542	ENCSR000DHM		yes	58151562	51217652		0.880761	0.519	138	n/a
G1E	H3K9me3	94	GATA1-deficient, erythroid-committed progenitor cell line	cell line	embryonic		VISION	Wu et al. 2014; PMID: 25319994	GSM946542	ENCSR000DHM		yes	94462484	85863747		0.908972	0.436	138	n/a
G1E-ER4+E2	H3K9me3	59	G1E clone rescued by expression of an E2-dependent GATA1-ER hybrid protein	cell line	embryonic		VISION	Dogan et al. 2015; PMID: 25984238	GSM946545	ENCSR000DHJ		yes	35454170	33684829		0.950095	0.337	2	n/a
G1E-ER4+E2	H3K9me3	134	G1E clone rescued by expression of an E2-dependent GATA1-ER hybrid protein	cell line	embryonic		VISION	Dogan et al. 2015; PMID: 25984238	GSM946545	ENCSR000DHJ		yes	94462484	85863747		0.908972	0.436	2	n/a
CH12	H3K9me3	104	B cell lymphoma	cell line	adult		VISION	Yue et al., 2014; PMID: 25409824	GSM946548	ENCSR000DHO		yes	101913146	94960061		0.931774	0.425	36	n/a
CH12	H3K9me3	156	B cell lymphoma	cell line	adult		VISION	Yue et al., 2014; PMID: 25409824	GSM946548	ENCSR000DHO		yes	126969012	121621369		0.957882	0.397	36	n/a
ERY_fl	H3K9me3	117	erythroblast	fetal liver	fetal		VISION	Pimkin_etal_2012	GSM946549	ENCSR000DHN		yes	119193749	104898521		0.880067	0.332	56	ter119+
ERY_fl	H3K9me3	144	erythroblast	fetal liver	fetal		VISION	Pimkin_etal_2012	GSM946549	ENCSR000DHN		yes	106319828	98985661		0.931018	0.208	56	ter119+
MK_fl	H3K9me3	125	megakaryocyte	fetal liver	fetal		VISION	Pimkin_etal_2012	GSM946541	ENCSR000DHH		yes	99810527	90582000		0.90754	0.293	48	CD41+
MK_fl	H3K9me3	129	megakaryocyte	fetal liver	fetal		VISION	Pimkin_etal_2012	GSM946541	ENCSR000DHH		yes	100094050	92457451		0.923706	0.307	48	CD41+
HPC7	H3K4me1	100129	multilineage myeloid progenitor cell line	cell line	embryonic		VISION	Wilson et al., 2016; PMID: 26809507	GSM1144554	GSM1144554		yes	63103662	56617273		0.897211	0.721	100136
LSK	H3K4me1		aggregation of 100040, 100041, 100042	bone marrow	adult		Amit_Hardison					yes	75640149	72672803		0.96077	0.475	183
LT-HSC	H3K4me1	100040	long term hematopoeitic stem cell	bone marrow	adult		Amit	Lara-Astiaso et al. 2014; PMID: 25103404	GSM1441285	GSM1441285			6147376	5867261		0.954433	0.186	183	Lin-, c-Kit+, Sca-1+, Flk2-, CD34-
ST-HSC	H3K4me1	100041	short term hematopoeitic stem cell	bone marrow	adult		Amit	Lara-Astiaso et al. 2014; PMID: 25103404	GSM1441286	GSM1441286			44932025	43160064		0.960564	0.44	183	Lin-, c-Kit+, Sca-1+, Flk2-, CD34+
MPP	H3K4me1	100042	multipotent progenitor	bone marrow	adult		Amit	Lara-Astiaso et al. 2014; PMID: 25103404	GSM1441287	GSM1441287			24560748	23645478		0.962734	0.456	183	Lin-, c-Kit+, Sca-1+, Flk2+, CD34+
CMP	H3K4me1	100043	common myeloid progenitor	bone marrow	adult		Amit	Lara-Astiaso et al. 2014; PMID: 25103404	GSM1441288	GSM1441288		yes	32957800	31805743		0.965044	0.387	183	Lin-, c-Kit+, Sca-1-, FcgRII low, CD34+
GMP	H3K4me1	100044	granulocyte macrophage progenitor	bone marrow	adult		Amit	Lara-Astiaso et al. 2014; PMID: 25103404	GSM1441289	GSM1441289		yes	21070684	19569476		0.928754	0.387	183	Lin-, c-Kit+, Sca-1-, FcgRII high, CD34+
MEP	H3K4me1	100045	megakaryocyte erythroid progenitor	bone marrow	adult		Amit	Lara-Astiaso et al. 2014; PMID: 25103404	GSM1441290	GSM1441290		yes	15893141	15000132		0.943812	0.36	183	Lin-, c-Kit+, Sca-1-, FcgRII-, CD34-
CFUE	H3K4me1	100046	Amit's Ery_A	spleen	adult		Amit	Lara-Astiaso et al. 2014; PMID: 25103404	GSM1441291	GSM1441291		yes	9596321	9596321		1	0.198	183	Ter119+, CD71+, high FSC
ERY	H3K4me1	100047	Amit's Ery_B	spleen	adult		Amit	Lara-Astiaso et al. 2014; PMID: 25103404	GSM1441292	GSM1441292		yes	17595723	16793983		0.954436	0.284	183	Ter119+, CD71+, low FSC
NEU	H3K4me1	100048	neutrophil	bone marrow	adult		Amit	Lara-Astiaso et al. 2014; PMID: 25103404	GSM1441293	GSM1441293		yes	27407570	26301921		0.959659	0.398	183	CD3- B220-, NK1.1-, CD11b+, Grl+, High SSC
MON	H3K4me1	100049	monocyte	bone marrow	adult		Amit	Lara-Astiaso et al. 2014; PMID: 25103404	GSM1441294	GSM1441294		yes	43942419	42144629		0.959088	0.348	183	CD3-, B220-, NK1.1-, F4/80-, CD115+, Low SSC
MAC	H3K4me1	100050	macrophage	bone marrow	adult		Amit	Lara-Astiaso et al. 2014; PMID: 25103404	GSM1441295	GSM1441295			36028787	34604995		0.960482	0.377	183	CD3-, B220-, F4/80-, CD115-, Low SSC
B cells	H3K4me1	100051	B cell	spleen	adult		Amit	Lara-Astiaso et al. 2014; PMID: 25103404	GSM1441296	GSM1441296		yes	41916093	40021839		0.954808	0.308	183	Cd3-, B220+, CD19+
T_CD4	H3K4me1	100052	T cell CD4+	spleen	adult		Amit	Lara-Astiaso et al. 2014; PMID: 25103404	GSM1441297	GSM1441297		yes	40768572	38865621		0.953323	0.183	183	CD3+, B220-, CD4+, CD8-
T_CD8	H3K4me1	100053	T cell CD8+	spleen	adult		Amit	Lara-Astiaso et al. 2014; PMID: 25103404	GSM1441298	GSM1441298		yes	26407811	25073200		0.949462	0.17	183	CD3+, B220-, CD4-, CD8+
NK	H3K4me1	100054	natural killer cell	spleen	adult		Amit	Lara-Astiaso et al. 2014; PMID: 25103404	GSM1441299	GSM1441299		yes	20610946	19723746		0.956955	0.35	183	CD4-, CD8-, B220-, I-Ab-, Ter119-, TCR-B-, NK1.1+
CLP	H3K4me1	100055	common lymphoid progenitor	bone marrow	adult		Amit	Lara-Astiaso et al. 2014; PMID: 25103404	GSM1441300	GSM1441300		yes	70640874	67463276		0.955018	0.429	183	Lin-, Flk2+, Il7R+
HPC7	H3K4me3	100134	multilineage myeloid progenitor cell line	cell line	embryonic		VISION	Wilson et al., 2016; PMID: 26809507			ERR1088386	yes	35800795	34416492		0.961333	0.943	100135
ERY	H3K4me3	100009	erythroblast	bone marrow	adult	eP17	VISION	Heuston et al. 2018; PMID: 29807547	GSM4255711				29403046	27309551		0.9288	0.049	100168	CD4-, CD8-, IL7Ra-, CD11b-, Ly6g-, CD45R-, Ter119+, CD44+, FSCLow
ERY	H3K4me3	100010	erythroblast	bone marrow	adult	eP18	VISION	Heuston et al. 2018; PMID: 29807547	GSM4255712				20403921	19124251		0.937283	0.030	100169	CD4-, CD8-, IL7Ra-, CD11b-, Ly6g-, CD45R-, Ter119+, CD44+, FSCLow
iMk	H3K4me3	100016	megakaryocyte	bone marrow	adult	mP20	VISION	Heuston et al. 2018; PMID: 29807547	GSM4255713			yes	17463220	16348938		0.936193	0.021	100083	CD4-, CD8-, IL7Ra-, CD11b-, Ly6g-, CD45R-, Ter119-, Sca1-, CD41+, CD61+, cKit-
iMk	H3K4me3	100126	megakaryocyte	bone marrow	adult	mP24	VISION	Heuston et al. 2018; PMID: 29807547	GSM4255714			yes	16784376	15815016		0.942246	0.145	100170	CD4-, CD8-, IL7Ra-, CD11b-, Ly6g-, CD45R-, Ter119-, Sca1-, CD41+, CD61+, cKit-
LSK	H3K4me3		aggregation of 100056, 100057, 100058	bone marrow	adult		Amit_Hardison					yes	22786629	21840228		0.958467	0.388	183
LT-HSC	H3K4me3	100056	long term hematopoeitic stem cell	bone marrow	adult		Amit	Lara-Astiaso et al. 2014; PMID: 25103404	GSM1441317	GSM1441317			3342746	3183074		0.952233	0.37	183	Lin-, c-Kit+, Sca-1+, Flk2-, CD34-
ST-HSC	H3K4me3	100057	short term hematopoeitic stem cell	bone marrow	adult		Amit	Lara-Astiaso et al. 2014; PMID: 25103404	GSM1441318	GSM1441318			15452492	14817611		0.958914	0.348	183	Lin-, c-Kit+, Sca-1+, Flk2-, CD34+
MPP	H3K4me3	100058	multipotent progenitor	bone marrow	adult		Amit	Lara-Astiaso et al. 2014; PMID: 25103404	GSM1441319	GSM1441319			3991391	3839543		0.961956	0.526	183	Lin-, c-Kit+, Sca-1+, Flk2+, CD34+
CMP	H3K4me3	100059	common myeloid progenitor	bone marrow	adult		Amit	Lara-Astiaso et al. 2014; PMID: 25103404	GSM1441320	GSM1441320		yes	22716248	21803296		0.959811	0.348	183	Lin-, c-Kit+, Sca-1-, FcgRII low, CD34+
GMP	H3K4me3	100060	granulocyte macrophage progenitor	bone marrow	adult		Amit	Lara-Astiaso et al. 2014; PMID: 25103404	GSM1441321	GSM1441321		yes	18846526	18125870		0.961762	0.367	183	Lin-, c-Kit+, Sca-1-, FcgRII high, CD34+
MEP	H3K4me3	100061	megakaryocyte erythroid progenitor	bone marrow	adult		Amit	Lara-Astiaso et al. 2014; PMID: 25103404	GSM1441322	GSM1441322		yes	16974110	16294386		0.959955	0.39	183	Lin-, c-Kit+, Sca-1-, FcgRII-, CD34-
CFUE	H3K4me3	100062	Amit's Ery_A	spleen	adult		Amit	Lara-Astiaso et al. 2014; PMID: 25103404	GSM1441323	GSM1441323		yes	4342718	4144827		0.954432	0.387	183	Ter119+, CD71+, high FSC
ERY	H3K4me3	100063	Amit's Ery_B	spleen	adult		Amit	Lara-Astiaso et al. 2014; PMID: 25103404	GSM1441324	GSM1441324		yes	3711997	3573783		0.962766	0.501	183	Ter119+, CD71+, low FSC
NEU	H3K4me3	100064	neutrophil	bone marrow	adult		Amit	Lara-Astiaso et al. 2014; PMID: 25103404	GSM1441325	GSM1441325		yes	13023192	12520960		0.961436	0.414	183	CD3- B220-, NK1.1-, CD11b+, Grl+, High SSC
MON	H3K4me3	100065	monocyte	bone marrow	adult		Amit	Lara-Astiaso et al. 2014; PMID: 25103404	GSM1441326	GSM1441326		yes	30830407	29442852		0.954994	0.333	183	CD3-, B220-, NK1.1-, F4/80-, CD115+, Low SSC
MAC	H3K4me3	100066	macrophage	bone marrow	adult		Amit	Lara-Astiaso et al. 2014; PMID: 25103404	GSM1441327	GSM1441327			33770607	32409511		0.959696	0.405	183	CD3-, B220-, F4/80-, CD115-, Low SSC
B	H3K4me3	100067	B cell	spleen	adult		Amit	Lara-Astiaso et al. 2014; PMID: 25103404	GSM1441328	GSM1441328		yes	13598744	12966315		0.953494	0.419	183	Cd3-, B220, CD19+
T_CD4	H3K4me3	100068	T cell CD4+	spleen	adult		Amit	Lara-Astiaso et al. 2014; PMID: 25103404	GSM1441329	GSM1441329		yes	32947487	31312346		0.950371	0.141	183	CD3+, B220-, CD4+, CD8-
T_CD8	H3K4me3	100069	T cell CD8+	spleen	adult		Amit	Lara-Astiaso et al. 2014; PMID: 25103404	GSM1441330	GSM1441330		yes	21738120	20599764		0.947633	0.139	183	CD3+, B220-, CD4-, CD8+
NK	H3K4me3	100070	natural killer cell	spleen	adult		Amit	Lara-Astiaso et al. 2014; PMID: 25103404	GSM1441331	GSM1441331		yes	4093410	3956035		0.96644	0.609	183	CD4-, CD8-, B220-, I-Ab-, Ter119-, TCR-B-, NK1.1+
CLP	H3K4me3	100071	common lymphoid progenitor	bone marrow	adult		Amit	Lara-Astiaso et al. 2014; PMID: 25103404	GSM1441332	GSM1441332		yes	21649655	20576385		0.950426	0.391	183	Lin-, Flk2+, Il7R+
HPC7	H3K27ac	100128	multilineage myeloid progenitor cell line	cell line	embryonic		VISION	Wilson et al., 2016; PMID: 26809507	GSM1329815	GSM1329815		yes	25683827	24909520		0.969852	0.761	100135
ERY	H3K27ac	100007	erythroblast	bone marrow	adult	eP10	VISION	Heuston et al. 2018; PMID: 29807547	GSM4255715				48761298	45588590		0.934934	0.143	100003	CD4-, CD8-, IL7Ra-, CD11b-, Ly6g-, CD45R-, Ter119+, CD44+, FSCLow
ERY	H3K27ac	100008	erythroblast	bone marrow	adult	eP11	VISION	Heuston et al. 2018; PMID: 29807547	GSM4255716				47575137	45028585		0.946473	0.122	100004	CD4-, CD8-, IL7Ra-, CD11b-, Ly6g-, CD45R-, Ter119+, CD44+, FSCLow
iMk	H3K27ac	100117	megakaryocyte	bone marrow	adult	mP31	VISION	Heuston et al. 2018; PMID: 29807547	GSM4255717			yes	46098658	28983141		0.62872	0.109	100116	CD4-, CD8-, IL7Ra-, CD11b-, Ly6g-, CD45R-, Ter119-, Sca1-, CD41+, CD61+, cKit-
iMk	H3K27ac	100119	megakaryocyte	bone marrow	adult	mP32	VISION	Heuston et al. 2018; PMID: 29807547	GSM4255718			yes	43998875	28904081		0.656928	0.143	100118	CD4-, CD8-, IL7Ra-, CD11b-, Ly6g-, CD45R-, Ter119-, Sca1-, CD41+, CD61+, cKit-
ERY_fl	H3K27ac	100160	erythroblast	fetal liver	fetal		ENCODE	Yue et al., 2014; PMID: 25409824		ENCSR000CDU		yes	13290425	12761946		0.960236	0.46	56, 150
ERY_fl	H3K27ac	100161	erythroblast	fetal liver	fetal		ENCODE	Yue et al., 2014; PMID: 25409824		ENCSR000CDU		yes	15250575	13862879		0.909007	0.483	56, 150
LSK	H3K27ac		aggregation of 100024, 100025, 100026	bone marrow	adult		Amit_Hardison					yes	27042425	25931396		0.958915	0.262	183
LT-HSC	H3K27ac	100024	long term hematopoeitic stem cell	bone marrow	adult		Amit	Lara-Astiaso et al. 2014; PMID: 25103404	GSM1441269				9528182	9093282		0.954356	0.163	183	Lin-, c-Kit+, Sca-1+, Flk2-, CD34-
ST-HSC	H3K27ac	100025	short term hematopoeitic stem cell	bone marrow	adult		Amit	Lara-Astiaso et al. 2014; PMID: 25103404	GSM1441270				8777529	8424847		0.95982	0.248	183	Lin-, c-Kit+, Sca-1+, Flk2-, CD34+
MPP	H3K27ac	100026	multipotent progenitor	bone marrow	adult		Amit	Lara-Astiaso et al. 2014; PMID: 25103404	GSM1441271				8736714	8413267		0.962978	0.258	183	Lin-, c-Kit+, Sca-1+, Flk2+, CD34+
CMP	H3K27ac	100027	common myeloid progenitor	bone marrow	adult		Amit	Lara-Astiaso et al. 2014; PMID: 25103404	GSM1441272			yes	30704862	29623941		0.964796	0.125	183	Lin-, c-Kit+, Sca-1-, FcgRII low, CD34+
GMP	H3K27ac	100028	granulocyte macrophage progenitor	bone marrow	adult		Amit	Lara-Astiaso et al. 2014; PMID: 25103404	GSM1441273			yes	21382534	16051811		0.750697	0.103	183	Lin-, c-Kit+, Sca-1-, FcgRII high, CD34+
MEP	H3K27ac	100029	megakaryocyte erythroid progenitor	bone marrow	adult		Amit	Lara-Astiaso et al. 2014; PMID: 25103404	GSM1441274			yes	6932711	6696530		0.965932	0.119	183	Lin-, c-Kit+, Sca-1-, FcgRII-, CD34-
CFUE	H3K27ac	100030	Amit's Ery_A	spleen	adult		Amit	Lara-Astiaso et al. 2014; PMID: 25103404	GSM1441275			yes	10635071	10197562		0.958862	0.177	183	Ter119+, CD71+, high FSC
ERY	H3K27ac	100031	Amit's Ery_B	spleen	adult		Amit	Lara-Astiaso et al. 2014; PMID: 25103404	GSM1441276			yes	18759845	18078126		0.963661	0.229	183	Ter119+, CD71+, low FSC
NEU	H3K27ac	100032	neutrophil	bone marrow	adult		Amit	Lara-Astiaso et al. 2014; PMID: 25103404	GSM1441277			yes	13214133	12797355		0.96846	0.235	183	CD3- B220-, NK1.1-, CD11b+, Grl+, High SSC
MON	H3K27ac	100033	monocyte	bone marrow	adult		Amit	Lara-Astiaso et al. 2014; PMID: 25103404	GSM1441278			yes	38360952	36811314		0.959604	0.118	183	CD3-, B220-, NK1.1-, F4/80-, CD115+, Low SSC
MAC	H3K27ac	100034	macrophage	bone marrow	adult		Amit	Lara-Astiaso et al. 2014; PMID: 25103404	GSM1441279				38636003	37187709		0.962514	0.141	183	CD3-, B220-, F4/80+, CD115-, Low SSC
B	H3K27ac	100035	B cell	spleen	adult		Amit	Lara-Astiaso et al. 2014; PMID: 25103404	GSM1441280			yes	8969259	8592153		0.957956	0.259	183	Cd3-, B220, CD19+
T_CD4	H3K27ac	100036	T cell CD4+	spleen	adult		Amit	LaraAstiaso_ etal_2014	GSM1441281				44364887	42021419		0.947177	0.047	183	CD3+, B220-, CD4+, CD8-
T_CD8	H3K27ac	100037	T cell CD8+	spleen	adult		Amit	LaraAstiaso_ etal_2014	GSM1441282				26457418	24943952		0.942796	0.039	183	CD3+, B220-, CD4-, CD8+
NK	H3K27ac	100038	natural killer cell	spleen	adult		Amit	Lara-Astiaso et al. 2014; PMID: 25103404	GSM1441283			yes	4893135	4744033		0.969528	0.502	183	CD4-, CD8-, B220-, I-Ab-, Ter119-, TCR-B-, NK1.1+
CLP	H3K27ac	100039	common lymphoid progenitor	bone marrow	adult		Amit	Lara-Astiaso et al. 2014; PMID: 25103404	GSM1441284			yes	48651788	46407458		0.95387	0.217	183	Lin-, Flk2+, Il7R+
LSK	H3K36me3	100142	Lin-, Sca1+, cKit+	bone marrow	adult		Bernstein	Adli_etal_2010	GSM548826				16784895	5044285		0.300525	0.242	1296
LSK	H3K36me3	100141	Lin-, Sca1+, cKit+	bone marrow	adult		Bernstein	Adli_etal_2010	GSM548827				32215410	10493493		0.325729	0.367	1296
HPC7	H3K36me3	100133	multilineage myeloid progenitor cell line	cell line	embryonic		VISION	Wilson et al., 2016; PMID: 26809507			ERR1088385	yes	40343552	39433602		0.977445	0.752	100135
NEU	H3K36me3	100147	neutrophil	blood	adult		Murre	Zhu_etal_2017	GSM2445216			yes	15569518	15064661		0.967574	0.527	100148	ECOMG,diff
LSK	H3K27me3	100143	Lin-, Sca1+, cKit+	bone marrow	adult		Bernstein	Adli_etal_2010	GSM548824				19696820	7040226		0.35743	0.227	1296
LSK	H3K27me3	100144	Lin-, Sca1+, cKit+	bone marrow	adult		Bernstein	Adli_etal_2010	GSM548825				32785645	10834300		0.330459	0.246	1296
HPC7	H3K27me3	100132	multilineage myeloid progenitor cell line	cell line	embryonic		VISION	Wilson et al., 2016; PMID: 26809507			ERR1088384	yes	38839451	34812800		0.896326	0.38	100135
ERY	H3K27me3	100145	erythroblast	spleen	adult		VISION	Kowalczyk_etal_2012	GSM689847			yes	30511912	27179377		0.890779	0.263	56, 150
NEU	H3K27me3	100149	neutrophil	blood	adult		Murre	Zhu_etal_2017	GSM2445212			yes	21480269	20299591		0.945034	0.163	100148	ECOMG,diff
T_CD4	H3K27me3	100152	T cells CD4+	spleen	adult		VISION	Escobar_etal_2014	GSM1151621				8324354	8010762		0.962328	0.027	100153
T_CD8	H3K27me3	100154	T cells CD8+	lymph nodes	adult			He et al. 2016; PMID: 27986453	GSM1972997				14621572	13173810		0.900985	0.112	100155	CD8+
T_CD8	H3K27me3	100156	T cells CD8+	lymph nodes	adult			He et al. 2016; PMID: 27986453	GSM1972997			yes	64424884	56510456		0.877153	0.107	100155	CD8+
NEU	H3K9me3	100150	neutrophil	cell line	adult		Murre	Zhu_etal_2017	GSM2445212			yes	20464340	19197887		0.938114	0.214	100148	ECOMG,diff
HPC7	CTCF	100127	multilineage myeloid progenitor cell line	cell line	embryonic		VISION	Wilson et al., 2016; PMID: 26809507	GSM1167572			yes	40085503	37929499		0.946215	0.7	100135
ERY	CTCF	100146	erythroblast	spleen	adult		VISION	Hughes_et al_2014	GSM1151145			yes	77792483	60523200		0.778008	0.28	56, 150
ERY_fl	CTCF	100162	erythroblast	fetal liver	fetal		ENCODE	Yue et al., 2014; PMID: 25409824		ENCFF096EGJ		yes	23408126	22098595		0.944057	0.41	56, 150
ERY_fl	CTCF	100163	erythroblast	fetal liver	fetal		ENCODE	Yue et al., 2014; PMID: 25409824		ENCFF803MRJ		yes	23637956	22789117		0.96409	0.33	56, 150
NEU	CTCF	100151	neutrophil	cell line	adult		MurreUCSD	Zhu_etal_2017	GSM2445202			yes	16574362	15638199		0.943517	0.07	100148	ECOMG,diff
MAC	CTCF	100164	macrophage	blood	adult		ENCODE	Yue et al., 2014; PMID: 25409824		ENCFF001LGV		yes	25175692	23464891		0.932046	0.09	100165	BMDM
MAC	CTCF	100166	macrophage	blood	adult		ENCODE	Yue et al., 2014; PMID: 25409824		ENCFF001LGW		yes	31232109	28948689		0.926889	0.12	100165	BMDM
T_CD4	CTCF	100157	T cells CD4+	spleen	adult			Vahedi_etal_2015	GSM1480825			yes	38156242	37438700		0.981195	0.55	100153	CD4+
T_CD8	CTCF	100158	T cells CD4+CD8+	thymus	adult			Shih et al., 2012	GSM1023418			yes	7349830	6894634		0.938067	0.55	100159	CD4+ CD8+
ERY_fl	p300	100224	erythroblast	fetal liver	fetal		Myers			ENCFF051PSQ			24461524	23124000	22617755	0.945321	0.076	2361
ERY_fl	p300	100226	erythroblast	fetal liver	fetal		Myers			ENCFF797QNA			27092856	25703842	25123391	0.948731	0.075	2362
MEL	p300	100228	erythroid progenitor	cell line	adult		Synder	Yue et al., 2014; PMID: 25409824		ENCFF001NXH			27723004	25254546	24662490	0.91096	0.245	2363
MEL	p300	100230	erythroid progenitor	cell line	adult		Synder	Yue et al., 2014; PMID: 25409824		ENCFF001NXM			33542819	30332862	29723695	0.904303	0.308	2364
CH12	p300	100232	B cell lymphoma	cell line	adult		Synder	Yue et al., 2014; PMID: 25409824		ENCFF001NKK			47069545	40148626	38974006	0.852964	0.167	2365
CH12	p300	100233	B cell lymphoma	cell line	adult		Synder	Yue et al., 2014; PMID: 25409824		ENCFF001NKH			38386458	34900559	34052408	0.909189	0.191	2365
