# Supplementary material for: An integrative view of the regulatory and transcriptional landscapes in mouse hematopoiesis
Source: Genome Res. 2020 Mar;30(3):472–84. doi: 10.1101/gr.255760.119 (PMC7111515; doi:10.1101/gr.255760.119)
Supplement: Supplemental Material [file supp_gr.255760.119_Supplemental_Table_S5.xlsx]

## Sheet: Supplemental_Table_S5
Supplemental Table S5: Input datasets*
Cell	Type	Library ID	Cell type	Tissue	Stage	External ID	Source	Reference	GEO	ENCODE	EBI	IDEAS 20.8	raw reads	mapped reads	filtered reads	%mapped	FRiP	Used for Library IDs	Isolation/Sort markers	Comments
LSK	input	1296	Lin-, Sca1+, cKit+	bone marrow	adult		VISION		GSM4255730				75202266	73075976		0.971726		1295, 100141, 100142, 100143, 100144	CD4-, CD8-, IL7Ra-, CD11b-, Ly6g-, CD45R-, Ter119-, cKit+, Sca1+
ERY_fl	input	56	erythroblast	fetal liver	fetal		VISION	Wu et al. 2014; PMID: 25319994	GSM946544	ENCSR000DIK			37209660	35894372		0.964652		95, 112, 117, 120, 124, 144
ERY_fl	input	150	erythroblast	fetal liver	fetal		VISION	Wu et al. 2014; PMID: 25319994	GSM946544	ENCSR000DIK			30508610	29284187		0.959866		116, 131, 132, 133
MK_fl	input	48	megakaryocyte	fetal liver	fetal		VISION	Wu et al. 2014; PMID: 25319994	GSM946539	ENCSR000DII			25179935	24326745		0.966116		96, 111, 118, 123, 125, 129, 145
MK_fl	input	140	megakaryocyte	fetal liver	fetal		VISION	Wu et al. 2014; PMID: 25319994	GSM946539	ENCSR000DII			100412540	88979379		0.886138		115, 119, 130
G1E	input	18	GATA1-deficient, erythroid-committed progenitor cell line	cell line	embryonic		VISION	Wu et al. 2014; PMID: 25319994	GSM946538	ENCSR000DJA			16009205	15632120		0.976446		15, 21, 22, 26, 75
G1E	input	138	GATA1-deficient, erythroid-committed progenitor cell line	cell line	embryonic		VISION	Wu et al. 2014; PMID: 25319994	GSM946538	ENCSR000DJA			104321216	97059640		0.930392		24, 87, 88, 94, 97, 108, 127
G1E-ER4+E2	input	2	G1E clone rescued by expression of an E2-dependent GATA1-ER hybrid protein	cell line	embryonic		VISION	Wu et al. 2014; PMID: 25319994	GSM946520	ENCSR000DIV			20711007	20174683		0.974104		11, 12, 13, 25, 59, 76, 134
G1E-ER4+E2	input	137	G1E clone rescued by expression of an E2-dependent GATA1-ER hybrid protein	cell line	embryonic		VISION	Wu et al. 2014; PMID: 25319994	GSM946520	ENCSR000DIV			111205783	101172193		0.909775		98, 99, 109, 113
CH12	input	36	B cell lymphoma	cell line	adult		VISION	Yue et al., 2014; PMID: 25409824	GSM946521	ENCSR000DIT			14634240	14400370		0.984019		35, 47, 86, 101, 102, 104, 156
CH12	input	141	B cell lymphoma	cell line	adult		VISION	Yue et al., 2014; PMID: 25409824	GSM946521	ENCSR000DIT			98550732	90860088		0.921963		100, 103, 126, 146, 157
ERY	input	100003	erythroblast	bone marrow	adult	eP10	VISION	Heuston et al. 2018; PMID: 29807547	GSM4255719				35182125	33989704		0.966107		100007
ERY	input	100004	erythroblast	bone marrow	adult	eP11	VISION	Heuston et al. 2018; PMID: 29807547	GSM4255720				35658566	34195678		0.958975		100008
ERY	input	100168	erythroblast	bone marrow	adult	eP17	VISION	Heuston et al. 2018; PMID: 29807547	GSM4255721				28662116	27240424		0.950398		100009
ERY	input	100169	erythroblast	bone marrow	adult	eP18	VISION	Heuston et al. 2018; PMID: 29807547	GSM4255722				31892416	30366031		0.95214		100010
MEG	input	100116	megakaryocyte	bone marrow	adult	mP31	VISION	Heuston et al. 2018; PMID: 29807547	GSM4255723				51470141	46097778		0.895622		100017
MEG	input	100118	megakaryocyte	bone marrow	adult	mP32	VISION	Heuston et al. 2018; PMID: 29807547	GSM4255724				52980275	47266379		0.892151		100019
MEG	input	100170	megakaryocyte	bone marrow	adult	mP24	VISION	Heuston et al. 2018; PMID: 29807547	GSM4255725				25119259	24124175		0.960386		100126
MEG	input	100022	megakaryocyte	bone marrow	adult			Heuston et al. 2018; PMID: 29807547	GSM4255726				31409858	30327208		0.965532
MEG	input	100023	megakaryocyte	bone marrow	adult			Heuston et al. 2018; PMID: 29807547	GSM4255727				34764987	33583064		0.966002
MEG	input	100083	megakaryocyte	bone marrow	adult	mP20	VISION	Heuston et al. 2018; PMID: 29807547	GSM4255728				38958125	37156240		0.953748		100016
MEP	input	183	megakaryocyte erythroid progenitor	bone marrow	adult		VISION		GSM4255731				50756079	49534698		0.975936		100024, 100025, 100026, 100027, 100028, 100029, 100030, 100031, 100032, 100033, 100034, 100035, 100036, 100037, 100038, 100039, 100040, 100042, 100043, 100044, 100045, 100046, 100047, 100048, 100049, 100050, 100051, 100052, 100053, 100054, 100055, 100056, 100057, 100058, 100059, 100060, 100061, 100062, 100063, 100064, 100065, 100066, 100067, 100068, 100069, 100070, 100071
HPC7	input	100135	multilineage myeloid progenitor cell line	cell line	embryonic		VISION	Wilson et al., 2016; PMID: 26809507	GSM552236				9739836	8996534		0.923684		100127, 00128, 100132, 100133, 100134
HPC7	input	100136	multilineage myeloid progenitor cell line	cell line	embryonic		VISION	Wilson et al., 2016; PMID: 26809507	GSM1144555				42773582	34422999		0.804772		100129
NEU	input	100148	neutrophil	ECOMG, diff	adult				GSM2445218				59524295	55079573		0.925329		100147, 100149, 100150, 100151	ECOMG,diff
MON	input	100165	bone marrow derived macrophage	bone marrow	adult		Ren			ENCSR000CFG			11410097	11095043		0.972388		100164, 100166	BMDM
T_CD4	input	100153	cultured CD4+ cells	spleen	adult				GSM1151615				17064515	16434103		0.963057		100152, 100157	cultured CD4+ cells
T_CD8	input	100155	CD45.2+CD8+KLRG1+ IL-7Ra–	lymph nodes	adult				GSM1972998				47883380	42385226		0.885176		100154, 100156	CD45.2+CD8+KLRG1+ IL-7Ra–
T_CD4 T_CD8	input	100159	CD4+CD8+ (DP) thymocytes	thymus	adult				GSM1023419				9930872	9690897		0.975835		100158	CD4+CD8+ (DP) thymocytes
*Unenriched chromatin corresponding to the ChIP-seq libraries indicated in column S.
